# Supplementary material for: A high-performance ambipolar organic field-effect transistor based on a bidirectional π-extended diketopyrrolopyrrole under ambient conditions
Source: Royal Society of Chemistry journal article supplement (doi:10.1039/c5ra08418k), 2015-01-01
Supplement: c5ra08418k1.pdf [file c5ra08418k1.pdf]

## Supporting information

### **A high-performance ambipolar organic field-effect transistors based on a bidirectional $\pi$ -extended diketopyrrolopyrrole under ambient conditions**

**Jinfeng Bai,<sup>a†</sup> Yucun Liu,<sup>a†</sup> Sangyoon Oh,<sup>b</sup> Wenwei Lei,<sup>a</sup> Bingzhu Yin<sup>\*a</sup>, Sooyoung Park<sup>\*b</sup> and Yuhe Kan,<sup>\*c</sup>**

<sup>a</sup> Key Laboratory of Natural Resources of Changbai Mountain & Functional Molecules, Yanbian University, Ministry of Education, Yanji, Jilin 133002, PR China. E-mail: zqcong@ybu.edu.cn; Fax: +86 433 2732456; Tel: +86 433 2732298

<sup>b</sup> Director of Center for Supramolecular Optoelectronic Materials (CSOM) Professor of Materials Science & Engineering, Seoul National University, email : parksy@snu.ac.k

<sup>c</sup> Jiangsu Province Key Laboratory for Chemistry of Low-Dimensional Materials, School of Chemistry and Chemical Engineering, Huaiyin Normal University, Huaian, China. E-mail: yhkan@yahoo.cn

† These authors contributed equally.

## Contents

### 1. Table

Table S1. Calculated absorption wavelength (nm), oscillator strength ( $f$ ) and transition nature of DPP-2T2P-2DCV

### 2. Figures

Fig. S1. FT-IR spectrum

Fig. S2. TGA and DSC curves

Fig. S3. Calculated and experimental UV-Vis spectra

Fig. S4. Typical output curves of the OFET devices in air.

Fig. S5. Typical output and transfer curves of the OFET devices in nitrogen

### 3. Characterization

Fig S6.  $^1\text{H}$  NMR spectrum of **DPP-2T2P-2CHO** in  $\text{CDCl}_3$ .

Fig S7.  $^{13}\text{C}$  NMR spectrum of **DPP-2T2P-2CHO** in  $\text{CDCl}_3$ .

Fig. S8. Mass spectrum of **DPP-2T2P-2CHO**.

Fig. S9.  $^1\text{H}$  NMR spectrum of **DPP-2T2P-2DCV** in  $\text{CDCl}_3$ .

Fig. S10.  $^{13}\text{C}$  NMR spectrum of **DPP-2T2P-2DCV** in  $\text{CDCl}_3$

Fig. S11. Mass spectrum of **DPP-2T2P-2DCV**.

## 1. Table

**Table S1.** Calculated absorption wavelength (nm), oscillator strength ( $f$ ) and transition nature of DPP-2T2P-2DCV at CAM-B3LYP/6-31g\* level of theory in chloroform solvent

| State                 | $\lambda_{\max}$ | $f$    | Main contributions                                                                      | Character                     |
|-----------------------|------------------|--------|-----------------------------------------------------------------------------------------|-------------------------------|
| $S_0 \rightarrow S_1$ | 595.4            | 2.0101 | HOMO $\rightarrow$ LUMO (88%)                                                           | CT(DPP $\rightarrow$ B-DCV)   |
| $S_0 \rightarrow S_3$ | 368.3            | 1.3508 | H-2 $\rightarrow$ LUMO (25%), H-1 $\rightarrow$ L+1 (17%), HOMO $\rightarrow$ L+2 (51%) | CT(DPP $\rightarrow$ B-DCV)   |
| $S_0 \rightarrow S_6$ | 335.5            | 0.4475 | H-2 $\rightarrow$ LUMO (46%), HOMO $\rightarrow$ L+2 (32%)                              | LE( $\pi \rightarrow \pi^*$ ) |

## 2. Figures

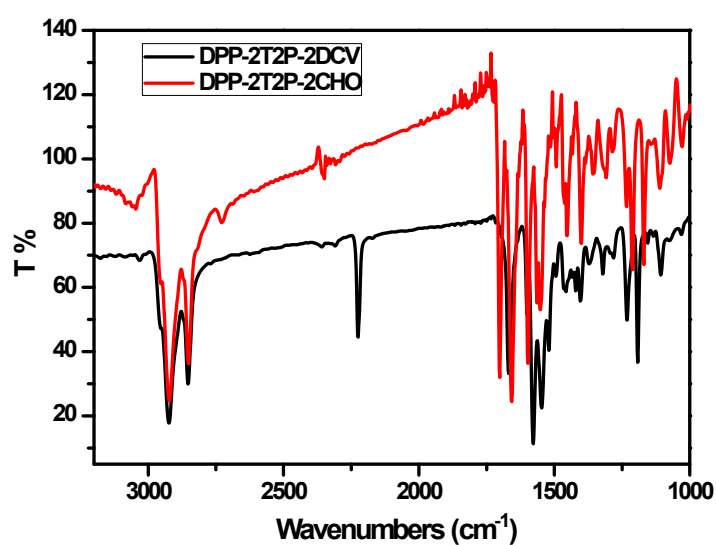

**Fig. S1** FT-IR spectrum of DPP-2T2P-2DCV and DPP-2T2P-2CHO.

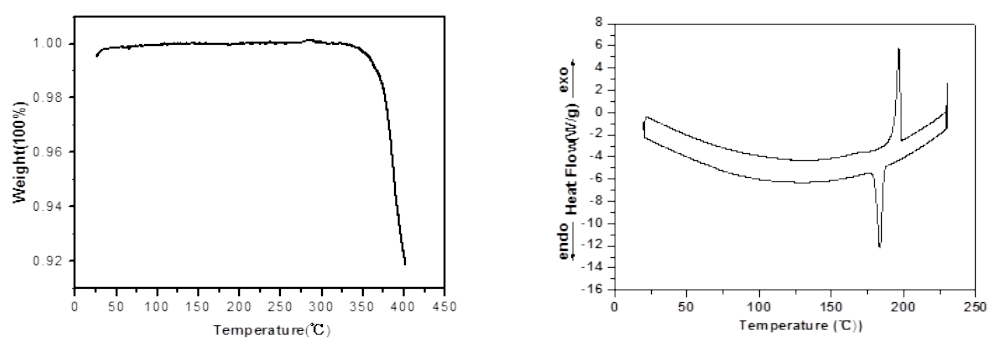

**Fig. S2.** (left) Thermogravimetric analysis and (right) differential scanning calorimetry curves for DPP-2T2P-2DCV.

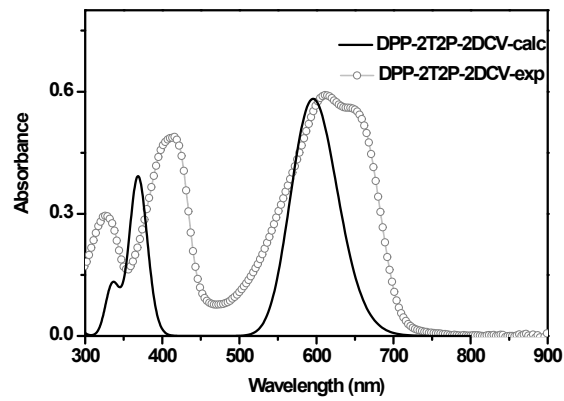

**Fig. S3** Calculated absorption spectra of compound I (black solid) compared with experimental spectra (white solid) in acetonitrile.

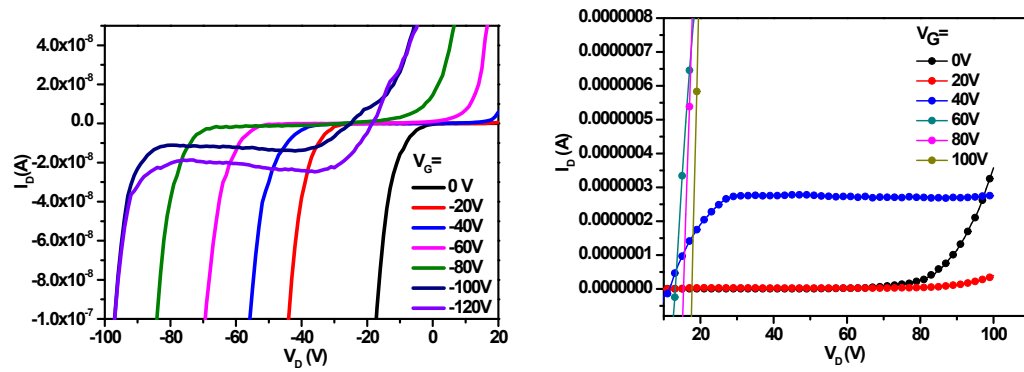

**Fig. S4** Typical output curves of the OFET devices in air.

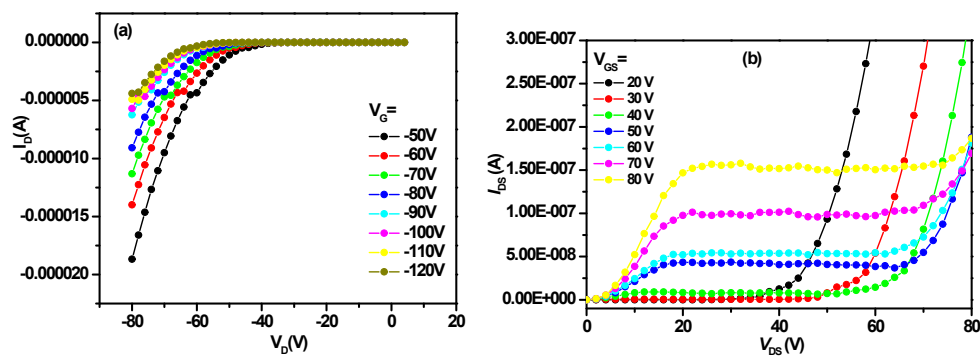

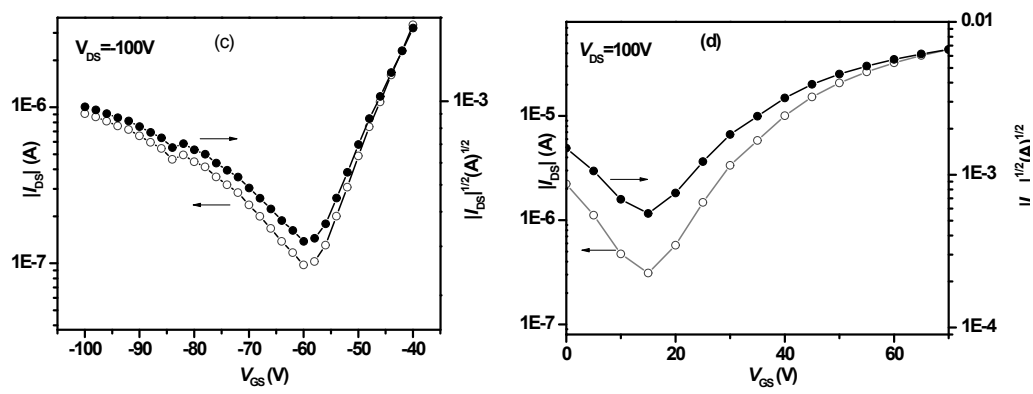

Fig. S5 Typical output (a,b) and transfer (c,d) curves of the OFET devices in nitrogen.

### 3. Characterization

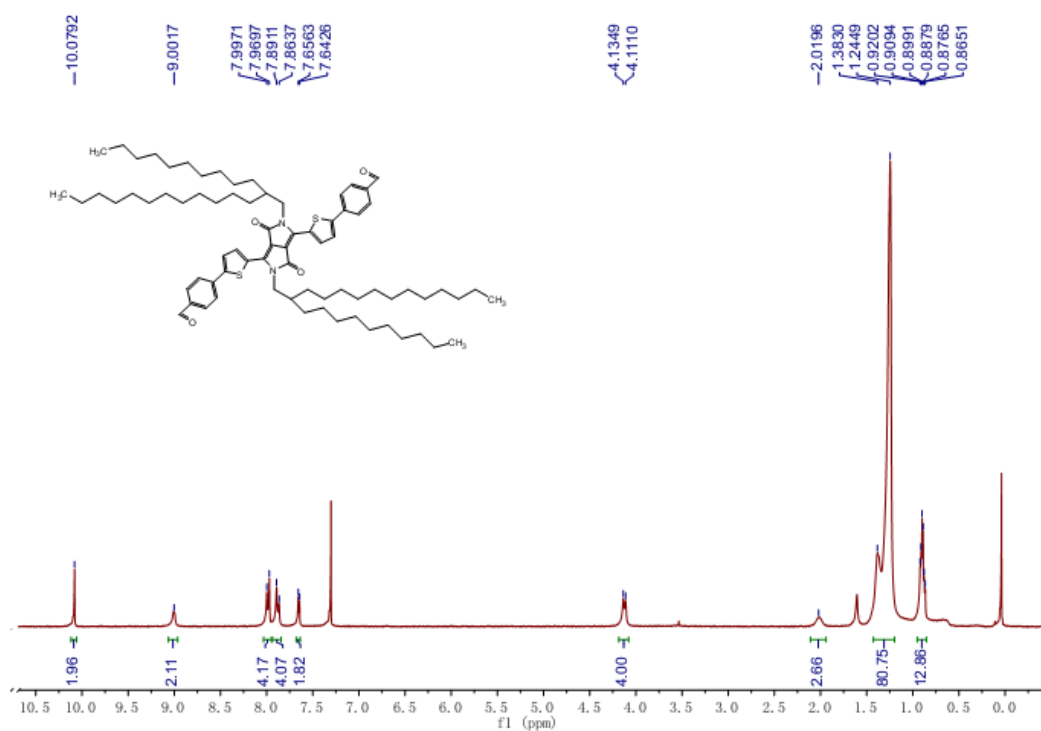

Fig. S6 <sup>1</sup>H NMR spectrum of DPP-2T2P-2CHO in CDCl<sub>3</sub>.

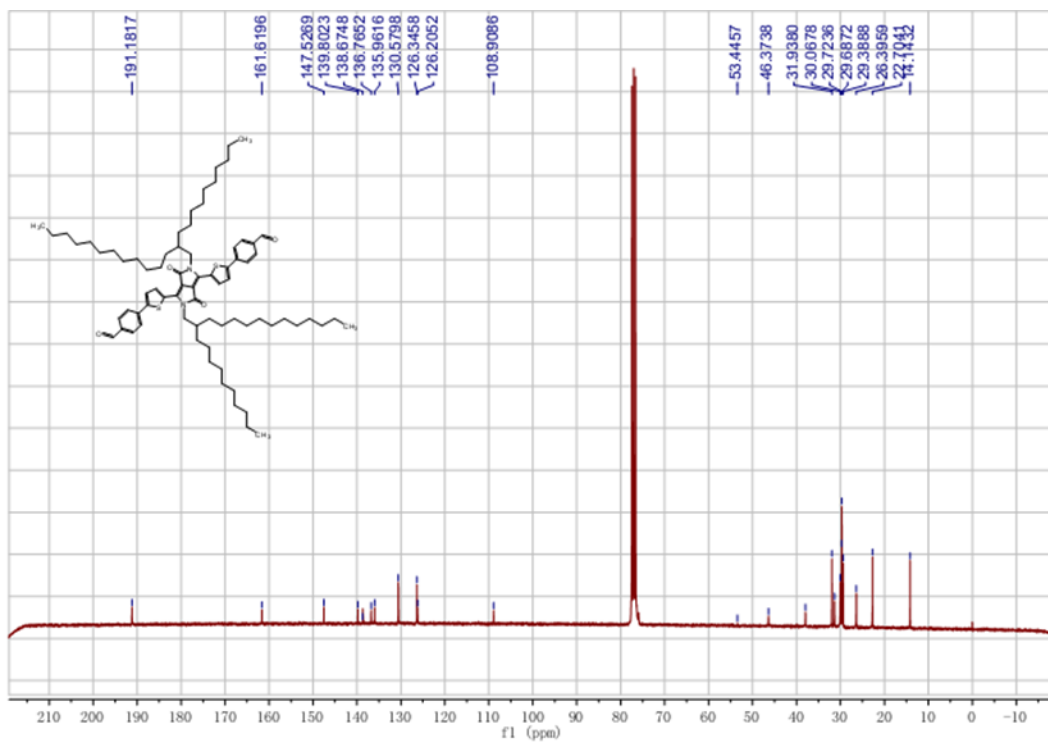

Fig. S7  $^{13}\text{C}$  NMR spectrum of **DPP-2T2P-2CHO** in  $\text{CDCl}_3$ .

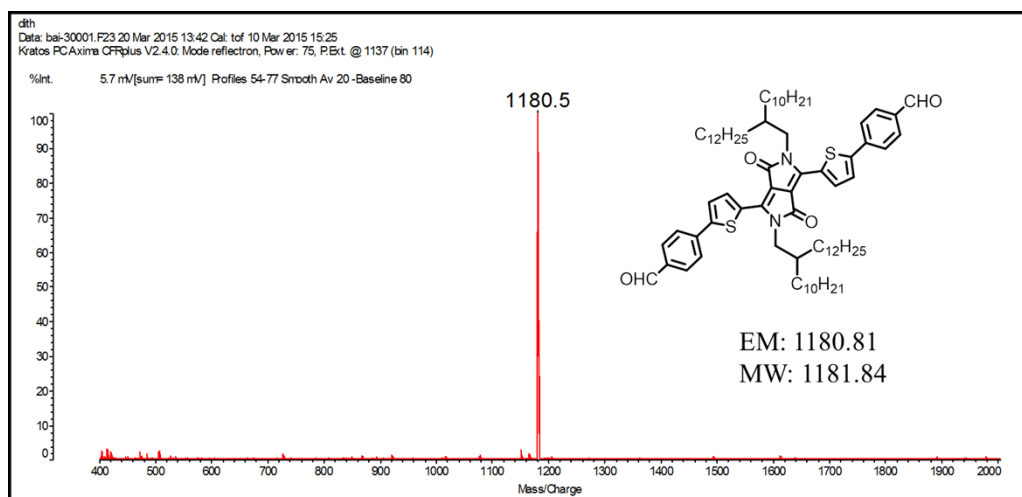

Fig. S8 Mass spectrum of **DPP-2T2P-2CHO**.

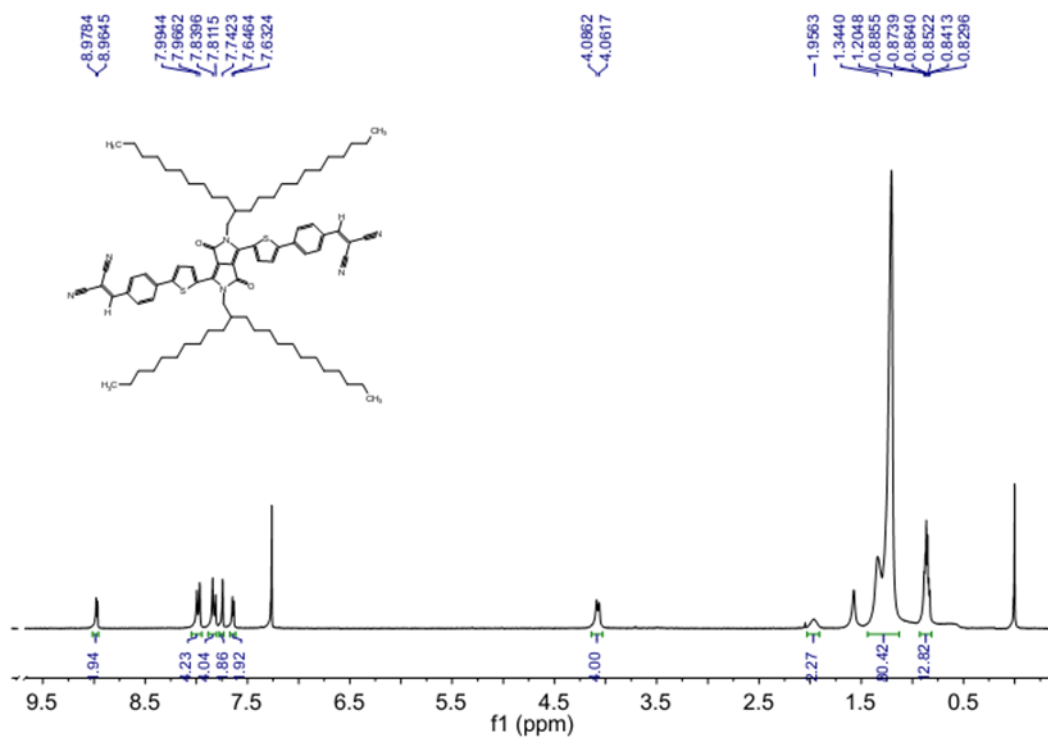

Fig. S9 <sup>1</sup>H NMR spectrum of DPP-2T2P-2DCV in CDCl<sub>3</sub>.

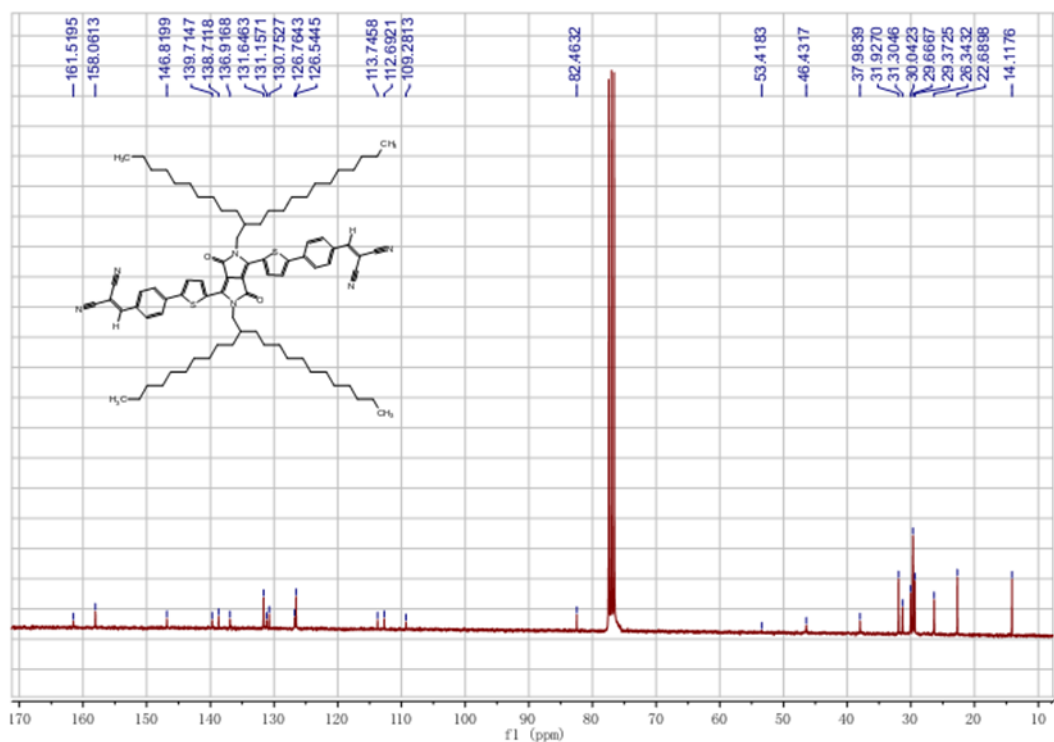

Fig. S10 <sup>13</sup>C NMR spectrum of DPP-2T2P-2DCV in CDCl<sub>3</sub>.

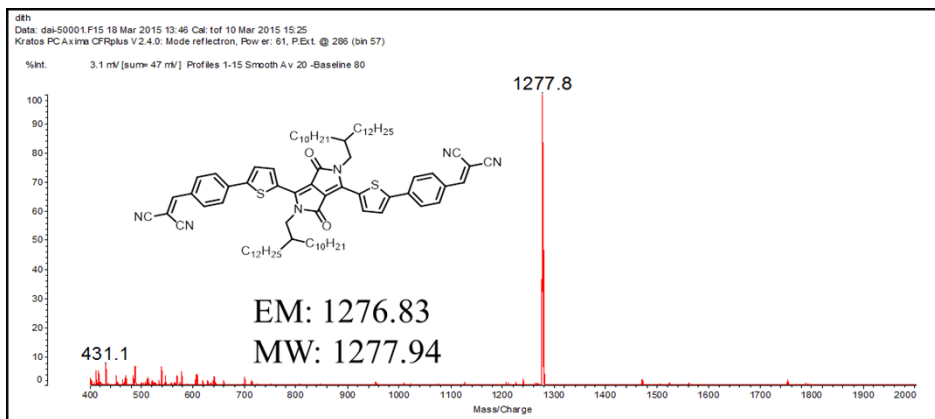

Fig.S11 Mass spectrum of **DPP-2T2P-2DCV**.
